1 **Hybrid immunity improves B cell frequency, antibody potency and breadth against SARS-CoV-2 and**  
2 **variants of concern**

3 Emanuele Andreano<sup>1</sup>, Ida Paciello<sup>1</sup>, Giulia Piccini<sup>2</sup>, Noemi Manganaro<sup>1</sup>, Piero Pileri<sup>1</sup>, Inesa  
4 Hyseni<sup>2,3</sup>, Margherita Leonardi<sup>2,3</sup>, Elisa Pantano<sup>1</sup>, Valentina Abbiento<sup>1</sup>, Linda Benincasa<sup>3</sup>, Ginevra  
5 Giglioli<sup>3</sup>, Concetta De Santi<sup>1</sup>, Massimiliano Fabbiani<sup>4</sup>, Ilaria Rancan<sup>4,5</sup>, Mario Tumbarello<sup>4,5</sup>,  
6 Francesca Montagnani<sup>4,5</sup>, Claudia Sala<sup>1</sup>, Emanuele Montomoli<sup>2,3,6</sup>, Rino Rappuoli<sup>1,7,\*</sup>

7  
8 <sup>1</sup>Monoclonal Antibody Discovery (MAD) Lab, Fondazione Toscana Life Sciences, Siena, Italy

9 <sup>2</sup>VisMederi S.r.l, Siena, Italy

10 <sup>3</sup>VisMederi Research S.r.l., Siena, Italy

11 <sup>4</sup>Department of Medical Biotechnologies, University of Siena, Siena, Italy

12 <sup>5</sup>Department of Medical Sciences, Infectious and Tropical Diseases Unit, Siena University Hospital,  
13 Siena, Italy

14 <sup>6</sup>Department of Molecular and Developmental Medicine, University of Siena, Siena, Italy

15 <sup>7</sup>Department of Biotechnology, Chemistry and Pharmacy, University of Siena, Siena, Italy

16

17 **\*To whom correspondence should be addressed:** Dr. Rino Rappuoli [rino.r.rappuoli@gsk.com](mailto:rino.r.rappuoli@gsk.com)

18

19 **Key words:** COVID-19; SARS-CoV-2; Monoclonal antibodies; Variants of concern; Vaccination; B  
20 cell repertoire

21 **ABSTRACT**

22 To understand the nature of the antibody response to SARS-CoV-2 vaccination, we analyzed at  
23 single cell level the B cell responses of five naïve and five convalescent people immunized with the  
24 BNT162b2 mRNA vaccine. Convalescents had higher frequency of spike protein specific memory B  
25 cells and by cell sorting delivered 3,532 B cells, compared with 2,352 from naïve people. Of these,  
26 944 from naïve and 2,299 from convalescents produced monoclonal antibodies against the spike  
27 protein and 411 of them neutralized the original Wuhan SARS-CoV-2 virus. More than 75% of the  
28 monoclonal antibodies from naïve people lost their neutralization activity against the B.1.351 (beta)  
29 and B.1.1.248 (gamma) variants while this happened only for 61% of those from convalescents. The  
30 overall loss of neutralization was lower for the B.1.1.7 (alpha) and B.1.617.2 (delta) variants, however  
31 it was always significantly higher in those of naïve people. In part this was due to the IGHV2-5;IGHJ4-  
32 1 germline, which was found only in convalescents and generated potent and broadly neutralizing  
33 antibodies. Overall, vaccination of seropositive people increases the frequency of B cells encoding  
34 antibodies with high potency and that are not susceptible to escape by any of the four variants of  
35 concern. Our data suggest that people that are seropositive following infection or primary vaccination  
36 will produce antibodies with increased potency and breadth and will be able to better control SARS-  
37 CoV-2 emerging variants.

## 38 INTRODUCTION

39 Twenty months after the beginning of the COVID-19 pandemic, with 200 million people infected, 4.2  
40 million deaths, and 3.9 billion vaccines doses administered, the world is still struggling to control the  
41 virus. In most developed countries vaccines have vastly reduced severe diseases, hospitalization  
42 and deaths, but they have not been able to control the infections which are fueled by new and more  
43 infectious variants. A large number of studies so far have shown that protection from infection is  
44 linked to the production of neutralizing antibodies against the spike protein (S protein) of the virus<sup>1-  
45 4</sup>. This is a metastable, trimeric class 1 fusion glycoprotein, composed by the S1 and S2 subunits,  
46 and mediates virus entry changing from a prefusion to postfusion conformation after binding to the  
47 human angiotensin-converting enzyme 2 (ACE2) receptor and heparan sulfates on the host cells<sup>5</sup>.  
48 Potent neutralizing antibodies recognize the S1 subunit of each monomer which includes the  
49 receptor binding domain (RBD) and N-terminal domain (NTD) immunodominant sites<sup>6</sup>. The large  
50 majority of neutralizing antibodies bind the receptor binding motif (RBM), within the RBD, and a  
51 smaller fraction target the NTD<sup>3,7</sup>. Neutralizing antibodies against the S2 subunit have been  
52 described, however they have very low potency<sup>3,8</sup>. Neutralizing antibodies generated after infection  
53 derive in large part from germline IGHV3-53 and the closely related IGHV3-66 with very few somatic  
54 mutations<sup>9,10</sup>. Starting from the summer of 2020, the virus started to generate mutations that allowed  
55 the virus to evade neutralizing antibodies, to become more infectious, or both. Some of the mutant  
56 viruses completely replaced the original Wuhan SARS-CoV-2. The most successful variant viruses  
57 are the B.1.1.7 (alpha), B.1.351 (beta), B.1.1.248 (gamma) and B.1.617.2 (delta) which have been  
58 named Variants of Concern (VoCs) by the World Health Organization<sup>11</sup>. The delta variant is presently  
59 spreading across the globe and causing big concern also in fully vaccinated populations. It is  
60 therefore imperative to understand the molecular dynamics of the immune response to vaccination  
61 in order to design better vaccines and vaccination policies. Several investigators have shown that  
62 vaccination of convalescent people can yield neutralizing antibodies which can be up to a thousand-  
63 fold higher than those induced by infection or vaccination, suggesting that one way of controlling the  
64 pandemic may be the induction of a hybrid immunity-like response using a third booster dose<sup>12-16</sup>.  
65 Here we compared at single cell level the nature of the neutralizing antibody response against the  
66 original Wuhan virus and the VoCs in naïve and convalescent subjects immunized with the  
67 BNT162b2 mRNA vaccine. Naïve subjects were seronegative before vaccination while convalescent  
68 donors were already seropositive before vaccination. They will be named seronegatives and  
69 seropositives respectively in this work. Our data suggest that immunization of people already  
70 seropositive to the virus, increases the frequency, potency and breadth of neutralizing antibodies  
71 and may help to control emerging variants.

## 72 RESULTS

### 73 High levels of S protein specific memory B cells and plasma activity in seropositive vaccinees

74 In this study we enrolled 10 donors vaccinated with the BNT162b2 mRNA vaccine, 5 of them were  
75 healthy people naïve to SARS-CoV-2 infection at vaccination (seronegative) and other 5 had  
76 recovered from SARS-CoV-2 infection before vaccination (seropositive). Subject details are  
77 summarized in **Table S1**. We initially analyzed the B cell population frequencies between our groups.  
78 Seropositives showed a 2.46-fold increase in S protein specific CD19<sup>+</sup>CD27<sup>+</sup>IgD-IgM<sup>-</sup> MBCs  
79 compared to seronegatives and an overall 10% higher level of CD19<sup>+</sup>CD27<sup>+</sup>IgD-IgM<sup>-</sup> MBCs (**Figure**  
80 **S1A-B**). On the other hand, seronegatives showed a 2.3-fold higher frequency of CD19<sup>+</sup>CD27<sup>+</sup>IgD-  
81 IgM<sup>+</sup> MBCs compared to seropositives. No differences were found in the levels of CD19<sup>+</sup>CD27<sup>+</sup>IgD-  
82 IgM<sup>+</sup> S protein<sup>+</sup> MBCs between the two groups assessed in this study (**Figure S1A-B**). Following the  
83 MBC analyses, we characterized the polyclonal response of these donors by testing their binding  
84 response to the S protein trimer, RBD, NTD and S2-domain, and subsequently by testing their  
85 neutralization activity against the original Wuhan SARS-CoV-2 virus (**Figure S2**). Plasma from  
86 seropositives showed a higher binding activity to the S protein and all tested domains compared to  
87 seronegatives (**Figure S2A - D**). In addition, seropositives showed a 10-fold higher neutralization  
88 activity against the original Wuhan SARS-CoV-2 virus compared to seronegatives (**Figure S2E - F**).

89

### 90 Frequency of neutralizing antibodies against the Wuhan virus and variants of concern

91 To better characterize the B cell immune response in seronegative and seropositive donors, we  
92 single cell sorted antigen-specific memory B cell (MBCs) using as bait the stabilized Wuhan SARS-  
93 CoV-2 S protein antigen which was encoded by the mRNA vaccine. The single cell sorting strategy  
94 was performed as previously described<sup>3</sup>. Briefly, MBCs prefusion S protein trimer-specific (S  
95 protein<sup>+</sup>), class-switched MBCs (CD19<sup>+</sup>CD27<sup>+</sup>IgD-IgM<sup>-</sup>) were single-cell sorted and then incubated  
96 for two weeks to naturally produce and release mAbs into the supernatant. A total of 2,352 and 3,532  
97 S protein<sup>+</sup> MBCs were sorted from seronegative and seropositive vaccinees respectively (**Table S2**).  
98 Of these 944 (40.1%) and 2,299 (65.1%) respectively, released in the supernatant monoclonal  
99 antibodies (mAbs) recognizing the S protein prefusion trimer in ELISA (**Figure 1A; Table S2**). These  
100 mAbs were then tested in a cytopathic effect-based microneutralization assay (CPE-MN) with the  
101 original Wuhan live SARS-CoV-2 virus at a single point dilution (1:5) to identify SARS-CoV-2  
102 neutralizing human monoclonal antibodies (nAbs). This first screening identified a total of 411 nAbs,  
103 of which 71 derived from seronegatives and 340 were from seropositives(**Figure 1B; Table S2**).  
104 Overall, the fraction of S protein-specific B cells producing nAbs were 7.5% for seronegatives and  
105 14.8% for seropositives. Following this first screening, all nAbs able to neutralize the Wuhan SARS-  
106 CoV-2 virus were tested by CPE-MN against major variants of concern (VoCs) including the B.1.1.7  
107 (alpha), B.1.351 (beta) and B.1.1.248 (gamma) to understand the breadth of neutralization of nAbs  
108 elicited by the BNT162b2 mRNA vaccine. At the time of this assessment the B.1.617.2 (delta) variant  
109 was not yet spread globally and therefore it was not available for screening. Seropositives had an

110 overall higher percentage of nAbs neutralizing the VoCs compared to seronegatives. The average  
111 frequency of nAbs from seropositives neutralizing the alpha, beta and gamma variants was 80.6  
112 (n=274), 39.4 (n=134) and 62.0% (n=211) respectively, compared to 70.4 (n=50), 22.5 (n=16) and  
113 43.6% (n=31) respectively in seronegatives (**Figure 1C**; **Table S2**).

114

### 115 **High potency and breadth of neutralization in seropositive COVID-19 vaccinees**

116 To better characterize and understand the potency and breadth of coverage of all Wuhan SARS-  
117 CoV-2 nAbs, we aimed to express as immunoglobulin G1 (IgG1) all the 411 nAbs previously  
118 identified. We were able to recover and express 276 antibodies for further characterization, 224  
119 (89.8%) from seropositives and 52 (10.2%) from seronegatives. Initially, antibodies were tested for  
120 binding against the RBD, NTD and the S2-domain of the original Wuhan SARS-CoV-2 S protein.  
121 Overall, no major differences were observed in nAbs that recognized the RBD and NTD with 71.2%  
122 (n=37) and 79.5% (n=178) nAbs binding the RBD, while 17.3% (n=9) and 16.5% (n=37) nAbs binding  
123 the NTD for seronegatives and seropositives respectively (**Figure S3**). None of the tested nAbs  
124 targeted the S2 domain. The biggest difference between groups was seen for nAbs able to bind the  
125 S protein only in its trimeric conformation i.e. not able to bind single domains. This class of nAbs was  
126 almost 3-fold higher in seronegatives compared to seropositives (**Figure S3**). nAbs were then tested  
127 by CPE-MN in serial dilution to evaluate their 100% inhibitory concentration (IC<sub>100</sub>) against the  
128 Wuhan SARS-CoV-2 virus and the VoCs. At this stage of the study, the B.1.617.2 (delta) spread  
129 globally, and we were able to obtain the live virus for our experiments. Overall, nAbs isolated from  
130 seropositive vaccinees had a significantly higher potency than those isolated from seronegatives.  
131 The IC<sub>100</sub> geometric mean (GM-IC<sub>100</sub>) in seropositives was 2.87, 2.17-, 1.17-, 1.43-, and 1.92-fold  
132 lower than in seronegatives for the Wuhan virus, the alpha, beta, gamma and delta VoCs respectively  
133 (**Figure 2**). In addition, a bigger fraction of nAbs from seropositives retained the ability to neutralize  
134 the VoCs. Indeed, when nAbs were individually tested against all VoCs, the ability to neutralize the  
135 alpha, beta, gamma and delta variants was lost by 14, 61, 61 and 29% of the antibodies from  
136 seropositives versus 32, 78, 75 and 46% respectively of those from seronegatives. The overall  
137 number of nAbs that lost neutralizing activity against the beta and gamma VoCs was very high, (75-  
138 78% in seronegatives and 61% in seropositives), while it was much lower for the alpha and delta  
139 variants (32-46% for seronegatives and 14-29% for seropositives) (**Figure 2**). Finally, a major  
140 difference between seronegatives and seropositives was found in the class of medium/high potency  
141 nAbs (IC<sub>100</sub> of 11-100 ng/mL and 101-1000 ng/mL) against all variants. Indeed, nAbs in these ranges  
142 from seropositives constitute the 71.0%, 62.5%, 23.7%, 22.8%, 53,1% of the whole nAbs repertoire  
143 while nAbs from seronegative donors were 48.1%, 38.5%, 17.3%, 17.3%, 34.6% against the Wuhan  
144 SARS-CoV-2 virus and alpha, beta, gamma and delta VoCs respectively (**Figure 2**).

145

### 146 **Functional gene repertoire of neutralizing antibodies**

147 The analysis of the immunoglobulin G heavy chain variable (IGHV) and joining (IGHJ) gene  
148 rearrangements of 58 and 278 sequences recovered from seronegative and seropositive subjects  
149 respectively, showed that they use a broad range of germlines and share the most abundant. In  
150 particular, both groups predominantly used the IGHV1-69;IGHJ4-1 and IGHV3-53;IGHJ6-1, which  
151 were shared by three out five subjects per each group (**Figure 3A**). In addition, the IGHV3-30;IGHJ6-  
152 1 and IGHV3-33;IGHJ4-1 germlines, more abundant in seronegative donors, and IGHV1-2;IGHJ6-  
153 1, mainly expanded in seropositive vaccinees, were also used with high frequency in both groups.  
154 Only the IGHV2-5;IGHJ4-1 germline was seen to be predominantly expanded only in seropositive  
155 donors (**Figure 3A**). To better characterize these predominant gene families, we evaluated their  
156 neutralization potency and breadth against SARS-CoV-2 and VoCs. In this analyses we could not  
157 evaluate IGHV3-33;IGHJ4-1 nAbs, as only three of these antibodies were expressed, but we  
158 included the IGHV3-53 closely related family IGHV3-66;IGHJ4-1, as this family was previously  
159 described to be mainly involved in SARS-CoV-2 neutralization<sup>9,17</sup>. A large part of nAbs deriving from  
160 these predominant germlines had a very broad range of neutralization potency against the original  
161 Wuhan SARS-CoV-2 virus with IC<sub>100</sub> spanning from less than 10 to over 10,000 ng/mL (**Figure 3B -**  
162 **G**). However, many of them lost the ability to neutralize SARS-CoV-2 VoCs. The loss of neutralizing  
163 activity occurred for most germlines and it was moderate against the alpha and delta variants, while  
164 it was dramatic against the beta and gamma variants (**Figure 3 B - G**). A notable exception was the  
165 IGHV2-5;IGHJ4-1 germline, present only in nAbs of seropositive patients, that showed potent  
166 antibodies able to equally neutralize all SARS-CoV-2 VoCs (**Figure 3D**). Finally, we evaluated the  
167 CDRH3-length and V-gene somatic hyper mutation (SHM) levels for all nAbs retrieved from  
168 seronegatives and seropositives and for predominant germlines. Overall, the two groups show a  
169 similar average CDRH3-length (15.0 aa and 15.1 aa for seronegatives and seropositives  
170 respectively), however seropositives showed almost 2-fold higher V-gene mutation levels compared  
171 to seronegatives (**Figure S4**). As for predominant gene derived nAbs, we observed heterogenous  
172 CDRH3-length, with the only exception of IGHV3-53;IGHJ6-1 nAbs, and higher V-gene mutation  
173 levels in seropositives predominant germlines compared to seronegatives (**Figure S5**).

174

### 175 **Epitope mapping of neutralizing antibodies**

176 To map the regions of the S protein recognized by the identified nAbs we used a competition assay  
177 with four known antibodies: J08, which targets the top loop of the receptor binding motif (RBM)<sup>3</sup>,  
178 S309, which binds the RBD but outside of the RMB region<sup>18</sup>, 4A8, that recognized the NTD<sup>19</sup>, and  
179 L19, that binds the S2-domain<sup>3</sup>(**Figure S6**). The nAbs identified in this study were pre-incubated with  
180 the original Wuhan SARS-CoV-2 S protein and subsequently the four nAbs labeled with different  
181 fluorophores were added as single mix. 50% signal reduction for one of the four fluorescently labelled  
182 nAbs, was used as threshold for positive competition. The vast majority of nAbs from both  
183 seronegative (50.0%; n=26) and seropositive (51.3%; n=115) vaccinees competed with J08 (**Figure**  
184 **4A; Table S3**). For seronegatives, the second most abundant population was composed by nAbs

185 that did not compete with any of the four fluorescently labelled nAbs (25.0%; n=13) followed by nAbs  
186 targeting the NTD (17.3%; n=9). As for seropositives, the second most abundant population was  
187 composed by nAbs that competed with S309 (21.4%; n=48) followed by nAbs competing with 4A8  
188 (15.6%; n=35) and not-competing nAbs (11.6%; n=26). None of our nAbs did compete with the S2  
189 targeting antibody L19 (**Figure 4A; Table S3**). nAbs competing with J08, which are likely to bind the  
190 RBM, derived from several germlines, including the predominant IGHV3-53;IGHJ6-1 (10.6%; n=14),  
191 IGHV1-69;IGHJ4-1 (8.3%; n=11) and IGHV1-2;IGHJ6-1 (6.8%; n=9) (**Figure 4B**). In contrast, those  
192 competing with S309 derived mostly from germline IGHV2-5;IGHJ4-1 (13.7%; n=7) which were  
193 isolated exclusively from seropositive vaccinees (**Figure 4C**). As for NTD-directed nAbs the non-  
194 predominant gene family IGHV1-24;IGHJ6-1 was the most abundant confirming what was reported  
195 in previous studies (**Figure 4D**)<sup>20</sup>. Finally, for nAbs that did not compete with any of the known  
196 antibodies used in our competition assay, the non-predominant gene families IGHV1-69;IGHJ3-1  
197 (9.7%; n=3) and IGHV1-69;IGHJ6-1 (9.7%; n=3) were the most abundant (**Figure 4E**).

## 198 DISCUSSION

199 Our study analyzed for the first time at single cell level the repertoire of B cells producing neutralizing  
200 antibodies following vaccination of naïve and previously infected people. The most important  
201 conclusion from this work is that vaccinating people that are already seropositive to the virus,  
202 because of previous SARS-CoV-2 infection, induces neutralizing antibodies which are more potent  
203 and less susceptible to escape from SARS-CoV-2 variants. This conclusion is not surprising since  
204 several papers have already reported that vaccination of convalescent people induces a hybrid  
205 immunity with titers of neutralizing antibodies up to 50-fold higher than those induced by vaccination  
206 of naïve people<sup>15,16</sup>. The novelty of our work lies in the molecular analysis of this response which  
207 shows that seropositive subjects respond to vaccination with more B cells producing antibodies  
208 which show higher neutralization potency and are not susceptible to escape variants. In part this is  
209 due to potent antibodies derived from the IGHV2-5;IGHJ4-1 germline which was only found in  
210 seropositive people. The absence of this germline in naïve vaccinees is also confirmed by previous  
211 studies<sup>16</sup>. One limitation of our study is that we did not include people that received a third booster  
212 dose of vaccine, as at the time that this work was being performed no policies for a third booster  
213 dose were implemented. In spite of this limitation, we believe that our conclusions are likely to be  
214 extendable to people that are seropositives following primary vaccination. Indeed, the S protein  
215 produced following vaccination with mRNA, viral vectors or following infection is produced in all  
216 cases by the cell of the host and it is likely to be presented to the immune system in a similar manner  
217 and generate a similar antibody response. This is confirmed by the fact that neutralizing antibodies  
218 following infection and vaccination derive mostly from the same immunodominant germ lines, i.e.  
219 IGHV3-53, 3-30 and 3-66<sup>9,10,16,17</sup>. Our analysis suggests that a booster dose of vaccine will increase  
220 the frequency of memory B cells producing potent neutralizing antibodies not susceptible to escape  
221 variants and allow better control of this pandemic. Our work also shows that more than three quarters  
222 of antibodies neutralizing the Wuhan virus do not neutralize at all the beta and gamma variants, while  
223 the fraction of antibodies not neutralizing the alpha and delta variants is much smaller and in all  
224 cases below 50%. This suggest that the beta and gamma variants were originally selected to escape  
225 natural immunity, while the alpha and gamma were selected mostly for their increased infectivity and  
226 ability to spread in the population<sup>21,22</sup>. The massive escape from predominant germ lines, such as  
227 IGHV3-53, 3-66, 3-30 and 1-69, and the presence of antibodies deriving from germline IGHV2-5 that  
228 are completely insensitive to the existing variants, suggest that the design of vaccines that  
229 preferentially promote or avoid the expansion of selected germ lines can generate broad protection  
230 against SARS-CoV-2 variants. Germline-targeting vaccination, which has been pioneered in the HIV  
231 field<sup>23,24</sup>, may be a promising strategy to fight the COVID-19 pandemic.



## 232 **MATERIALS & METHODS**

### 233 **Enrollment of COVID-19 vaccinees and human sample collection**

234 This work results from a collaboration with the Azienda Ospedaliera Universitaria Senese, Siena (IT)  
235 that provided samples from COVID-19 vaccinated donors, of both sexes, who gave their written  
236 consent. The study was approved by local ethics committees (Parere 17065 in Siena) and conducted  
237 according to good clinical practice in accordance with the declaration of Helsinki (European Council  
238 2001, US Code of Federal Regulations, ICH 1997). This study was unblinded and not randomized.  
239 No statistical methods were used to predetermine sample size.

240

### 241 **Single cell sorting of SARS-CoV-2 S protein<sup>+</sup> memory B cells from COVID-19 vaccinees**

242 Peripheral blood mononuclear cells (PBMCs) and single cell sorting strategy were performed as  
243 previously described<sup>3</sup>. Briefly, PBMC were isolated from heparin-treated whole blood by density  
244 gradient centrifugation (Ficoll-Paque™ PREMIUM, Sigma-Aldrich). After separation, PBMC were  
245 stained with Live/Dead Fixable Aqua (Invitrogen; Thermo Scientific) diluted 1:500 at room  
246 temperature RT. After 20 min incubation cells were washed with PBS and unspecific bindings were  
247 saturated with 20% normal rabbit serum (Life technologies). Following 20 min incubation at 4°C cells  
248 were washed with PBS and stained with SARS-CoV-2 S-protein labeled with Strep-Tactin®XT DY-  
249 488 (iba-lifesciences cat# 2-1562-050) for 30 min at 4°C. After incubation the following staining mix  
250 was used CD19 V421 (BD cat# 562440), IgM PerCP-Cy5.5 (BD cat# 561285), CD27 PE (BD cat#  
251 340425), IgD-A700 (BD cat# 561302), CD3 PE-Cy7 (BioLegend cat# 300420), CD14 PE-Cy7  
252 (BioLegend cat# 301814), CD56 PE-Cy7 (BioLegend cat# 318318) and cells were incubated at 4°C  
253 for additional 30 min. Stained MBCs were single cell-sorted with a BD FACS Aria III (BD Biosciences)  
254 into 384-well plates containing 3T3-CD40L feeder cells and were incubated with IL-2 and IL-21 for  
255 14 days as previously described<sup>25</sup>.

256

### 257 **ELISA assay with SARS-CoV-2 S protein prefusion trimer**

258 mAbs and plasma binding specificity against the S-protein trimer was detected by ELISA as  
259 previously described<sup>3</sup>. Briefly, 384-well plates (microplate clear, Greiner Bio-one) were coated with  
260 3 µg/mL of streptavidin (Thermo Fisher) diluted in carbonate-bicarbonate buffer (E107, Bethyl  
261 laboratories) and incubated at RT overnight. The next day, plates were incubated 1 h at RT with  
262 3µg/mL of SARS-CoV-2 S protein diluted in PBS. Plates were then saturated with 50 µL/well of  
263 blocking buffer (phosphate-buffered saline, 1% BSA) for 1 h at 37°C. After blocking, 25 µL/well of  
264 mAbs diluted 1:5 in sample buffer (phosphate-buffered saline, 1% BSA, 0.05% Tween-20) were  
265 added to the plates and were incubated at 37°C. Plasma samples derived from vaccinees were  
266 tested (starting dilution 1:10; step dilution 1:2 in sample buffer) in a final volume of 25 µL/well and  
267 were incubated at 37°C. After 1 h of incubation, 25 µL/well of alkaline phosphatase-conjugated goat  
268 antihuman IgG and IgA (Southern Biotech) diluted 1:2000 in sample buffer were added. Finally, S  
269 protein binding was detected using 25 µL/well of PNPP (p-nitrophenyl phosphate; Thermo Fisher)

270 and the reaction was measured at a wavelength of 405 nm by the Varioskan Lux Reader (Thermo  
271 Fisher Scientific). After each incubation step, plates were washed three times with 100µl/well of  
272 washing buffer (phosphate-buffered saline, 0.05% Tween-20). Sample buffer was used as a blank  
273 and the threshold for sample positivity was set at 2-fold the optical density (OD) of the blank.

274

#### 275 **ELISA assay with RBD, NTD and S2 subunits**

276 mAbs identification and plasma screening of vaccinees against RBD, NTD or S2 SARS-CoV-2  
277 protein were performed by ELISA. Briefly, 3 µg/mL of RBD, NTD or S2 SARS-CoV-2 protein diluted  
278 in carbonate-bicarbonate buffer (E107, Bethyl laboratories) were coated in 384-well plates  
279 (microplate clear, Greiner Bio-one). After overnight incubation at 4°C, plates were washed 3 times  
280 with washing buffer (phosphate-buffered saline, 0.05% Tween-20) and blocked with 50 µL/well of  
281 blocking buffer (phosphate-buffered saline, 1% BSA) for 1h at 37°C. After washing, plates were  
282 incubated 1 h at 37 °C with mAbs diluted 1:5 in samples buffer (phosphate-buffered saline, 1% BSA,  
283 0.05% Tween-20) or with plasma at a starting dilution 1:10 and step diluted 1:2 in sample buffer.  
284 Wells with no sample added were consider blank controls. Anti-Human IgG –Peroxidase antibody  
285 (Fab specific) produced in goat (Sigma) diluted 1:45000 in sample buffer was then added and  
286 samples were incubated for 1 h at 37°C. Plates were then washed, incubated with TMB substrate  
287 (Sigma) for 15 min before adding the stop solution (H<sub>2</sub>SO<sub>4</sub> 0.2M). The OD values were identified  
288 using the Varioskan Lux Reader (Thermo Fisher Scientific) at 450 nm. Each condition was tested in  
289 triplicate and samples tested were considered positive if OD value was 2-fold the blank.

290

#### 291 **Flow cytometry-based competition assay**

292 To classify mAbs candidates on the basis of their interaction with Spike epitopes, we performed a  
293 flow cytometry-based competition assay. In detail, magnetic beads (Dynabeads His-Tag, Invitrogen)  
294 were coated with histidine tagged S protein according to the manufacturers' instructions. Then, 20  
295 µg/ml of coated S-protein-beads were pre-incubated with unlabeled nAbs candidates diluted 1:2 in  
296 PBS for 40 minutes at RT. After incubation, the mix Beads-antibodies was washed with 100 µL of  
297 PBS-BSA 1%. Then, to analyze epitope competition, mAbs able to bind RBD (J08, S309), NTD (4A8)  
298 or S2 (L19) domain of the S-protein were labeled with 4 different fluorophores (Alexa Fluor 647, 488,  
299 594 and 405) using Alexa Fluor NHS Ester kit (Thermo Scientific), were mixed and incubated with  
300 S-protein-beads. Following 40 minutes of incubation at RT, the mix Beads-antibodies was washed  
301 with PBS, resuspended in 150 µL of PBS-BSA 1% and analyzed using BD LSR II flow cytometer  
302 (Becton Dickinson). Beads with or without S-protein incubated with labeled antibodies mix were used  
303 as positive and negative control respectively. Analysis was performed using FlowJo (version 10).

304

#### 305 **SARS-CoV-2 authentic viruses neutralization assay**

306 All SARS-CoV-2 authentic virus neutralization assays were performed in the biosafety level 3 (BSL3)  
307 laboratories at Toscana Life Sciences in Siena (Italy) and Vismederi Srl, Siena (Italy). BSL3  
308 laboratories are approved by a Certified Biosafety Professional and are inspected every year by local  
309 authorities. To evaluate the neutralization activity of identified nAbs against SARS-CoV-2 and all  
310 VoCs and evaluate the breadth of neutralization of this antibody is a cytopathic effect-based  
311 microneutralization assay (CPE-MN) was performed<sup>3</sup>. Briefly, the CPE-based neutralization assay  
312 sees the co-incubation of J08 with a SARS-CoV-2 viral solution containing 100 TCID<sub>50</sub> of virus and  
313 after 1 hour incubation at 37°C, 5% CO<sub>2</sub>. The mixture was then added to the wells of a 96-well plate  
314 containing a sub-confluent Vero E6 cell monolayer. Plates were incubated for 3-4 days at 37°C in a  
315 humidified environment with 5% CO<sub>2</sub>, then examined for CPE by means of an inverted optical  
316 microscope by two independent operators. All nAbs were tested a starting dilution of 1:5 and the  
317 IC<sub>100</sub> evaluated based on their initial concentration while plasma samples were tested starting from  
318 a 1:10 dilution. Both nAbs and plasma samples were then diluted step 1:2. Technical duplicates were  
319 performed for both nAbs and plasma samples. In each plate positive and negative control were used  
320 as previously described<sup>3</sup>.

321

#### 322 **SARS-CoV-2 virus variants CPE-MN neutralization assay**

323 The SARS-CoV-2 viruses used to perform the CPE-MN neutralization assay were the original Wuhan  
324 SARS-CoV-2 virus (SARS-CoV-2/INMI1-Isolate/2020/Italy: MT066156), SARS-CoV-2 B.1.1.7 (INMI  
325 GISAID accession number: EPI\_ISL\_736997), SARS-CoV-2 B.1.351 (EVAg Cod: 014V-04058),  
326 B.1.1.248 (EVAg CoD: 014V-04089) and B.1.617.2 (GISAID ID: EPI\_ISL\_2029113)<sup>26</sup>.

327

#### 328 **Single cell RT-PCR and Ig gene amplification and transcriptionally active PCR expression**

329 The whole process for nAbs heavy and light chain recovery, amplification and transcriptionally active  
330 PCR (TAP) expression was performed as previously described<sup>3</sup>. Briefly, 5 µL of cell lysate were  
331 mixed with 1 µL of random hexamer primers (50 ng/µL), 1 µL of dNTP-Mix (10 mM), 2 µL 0.1 M DTT,  
332 40 U/µL RNase OUT, MgCl<sub>2</sub> (25 mM), 5x FS buffer and Superscript IV reverse transcriptase  
333 (Invitrogen) to perform RT-PCR. Reverse transcription (RT) reaction was performed at 42°C/10',  
334 25°C/10', 50°C/60' and 94°/5'. Two rounds of PCR were performed to obtain the heavy (VH) and  
335 light (VL) chain amplicons. All PCR reactions were performed in a nuclease-free water (DEPC) in a  
336 total volume of 25 µL/well. For PCR I, 4 µL of cDNA were mixed with 10 µM of VH and 10 µM VL  
337 primer-mix, 10mM dNTP mix, 0.125 µL of Kapa Long Range Polymerase (Sigma), 1.5 µL MgCl<sub>2</sub> and  
338 5 µL of 5x Kapa Long Range Buffer. PCR I reaction was performed at 95°/3', 5 cycles at 95°C/30",  
339 57°C/30", 72°C/30" and 30 cycles at 95°C/30", 60°C/30", 72°C/30" and a final extension of 72°/2'.  
340 Nested PCR II was performed as above starting from 3.5 µL of unpurified PCR I product. PCR II  
341 products were purified by Millipore MultiScreen® PCRµ96 plate according to manufacture  
342 instructions and eluted in 30 µL of nuclease-free water (DEPC). As for TAP expression, vectors were  
343 initially digested using restriction enzymes AgeI, Sall and Xho as previously described and PCR II

344 products ligated by using the Gibson Assembly NEB into 25 ng of respective human Igγ1, Igκ and  
345 Igλ expression vectors<sup>27,28</sup>. TAP reaction was performed using 5 μL of Q5 polymerase (NEB), 5 μL  
346 of GC Enhancer (NEB), 5 μL of 5X buffer, 10 mM dNTPs, 0.125 μL of forward/reverse primers and 3  
347 μL of ligation product, using the following cycles: 98°/2', 35 cycles 98°/10", 61°/20", 72°/1' and 72°/5'.

348

### 349 **Functional repertoire analyses**

350 nAbs VH and VL sequence reads were manually curated and retrieved using CLC sequence viewer  
351 (Qiagen). Aberrant sequences were removed from the data set. Analyzed reads were saved in  
352 FASTA format and the repertoire analyses was performed using Cloanlyst  
353 (<http://www.bu.edu/computationalimmunology/research/software/>)<sup>29,30</sup>.

354

### 355 **Statistical analysis**

356 Statistical analysis was assessed with GraphPad Prism Version 8.0.2 (GraphPad Software, Inc., San  
357 Diego, CA). Nonparametric Mann-Whitney t test was used to evaluate statistical significance  
358 between the two groups analyzed in this study. Statistical significance was shown as \* for values ≤  
359 0.05, \*\* for values ≤ 0.01, \*\*\* for values ≤ 0.001, and \*\*\*\* for values ≤ 0.0001.

360

### 361 **Data availability**

362 All data supporting the findings in this study are available within the article or can be obtained from  
363 the corresponding author upon request.

364 **ACKNOWLEDGMENTS**

365 This work was funded by the European Research Council (ERC) advanced grant agreement number  
366 787552 (vAMRes). This publication was supported by funds from the “Centro Regionale Medicina di  
367 Precisione” and by all the people who answered the call to fight with us the battle against SARS-  
368 CoV-2 with their kind donations on the platform ForFunding  
369 (<https://www.forfunding.intesasanpaolo.com/DonationPlatform-ISP/nav/progetto/id/3380>). This  
370 work was funded by COOP ITALIA Soc. Coop. This publication was supported by the European Virus  
371 Archive goes Global (EVAg) project, which has received funding from the European Union’s Horizon  
372 2020 research and innovation program under grant agreement No 653316. This publication was  
373 supported by the COVID-2020-12371817 project, which has received funding from the Italian  
374 Ministry of Health. We would also like to acknowledge Dr. Jason McLellan, for kindly providing the S  
375 protein trimer, RBD, NTD and S2 constructs, and Dr. Olivier Schwartz, for providing the B.1.617.2  
376 (delta) SARS-CoV-2 variant. We would like to thank the nurse staff of the operative unit of the  
377 department of Medical Sciences, Infectious and Tropical Diseases Unit, Siena University Hospital,  
378 Siena, Italy, and all the COVID-19 vaccinated donors for participating to this study.

379

380 **AUTHOR CONTRIBUTIONS**

381 EA and RR conceived the project. FM, MF, IR and MT enrolled COVID-19 vaccinees to the study.  
382 EA and IP performed PBMC isolation and single cell sorting. IP performed ELISAs and competition  
383 assays. IP and NM recovered nAbs VH and VL and expressed antibodies. PP and EA recovered VH  
384 and VL sequences and performed the repertoire analyses. EP and VA produced and purified SARS-  
385 CoV-2 S protein constructs. EA, GP, IH, ML, LB and GG performed neutralization assays in BSL3  
386 facilities. CDS supported day-by-day laboratory activities and management. EA and RR wrote the  
387 manuscript. All authors contributed to the final revision of the manuscript. EA, CS, EM and RR  
388 coordinated the project.

389

390 **DECLARATION OF INTERESTS**

391 Rino Rappuoli is an employee of GSK group of companies. EA, IP, NM, PP, EP, CDS, CS and RR  
392 are listed as inventors of full-length human monoclonal antibodies described in Italian patent  
393 applications n. 102020000015754 filed on June 30th 2020, 102020000018955 filed on August 3rd  
394 2020 and 102020000029969 filed on 4th of December 2020, and the international patent system  
395 number PCT/IB2021/055755 filed on the 28th of June 2021.

396 **FIGURES**

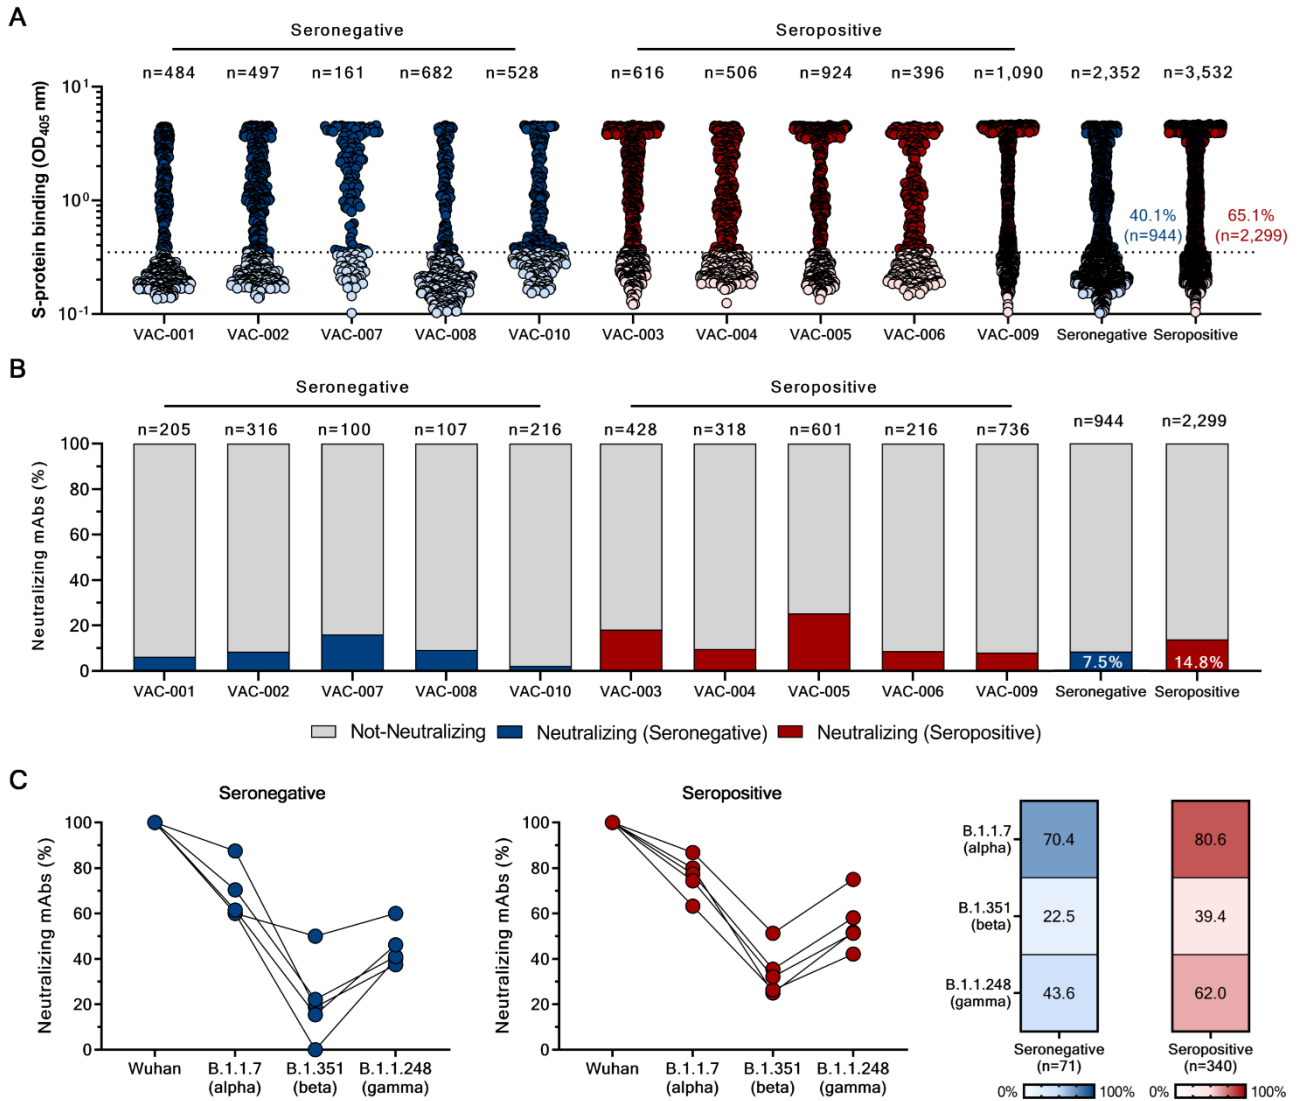

397  
 398 **Figure 1. Identification of cross-neutralizing SARS-CoV-2 S protein-specific nAbs.** (A) The graph  
 399 shows supernatants tested for binding to the Wuhan SARS-CoV-2 S protein antigen stabilized in its  
 400 prefusion conformation. Threshold of positivity has been set as two times the value of the blank  
 401 (dotted line). Dark blue and red dots represent mAbs that bind to the S protein for seronegative and  
 402 seropositive vaccinees respectively. Light blue and red dots represent mAbs that do not bind the S  
 403 protein for seronegative and seropositive vaccinees. (B) The bar graph shows the percentage of not-  
 404 neutralizing (gray), neutralizing mAbs from seronegatives (dark blue), and neutralizing mAbs for  
 405 seropositives (dark red). The total number (n) of antibodies tested per individual is shown on top of  
 406 each bar (C) Graphs show the fold change percentage of nAbs in seronegatives and seropositives  
 407 against the alpha, beta and gamma VoCs compared to the original Wuhan SARS-CoV-2 virus. The  
 408 heatmaps show the overall percentage of Wuhan SARS-CoV-2 nAbs able to neutralize tested VoCs.

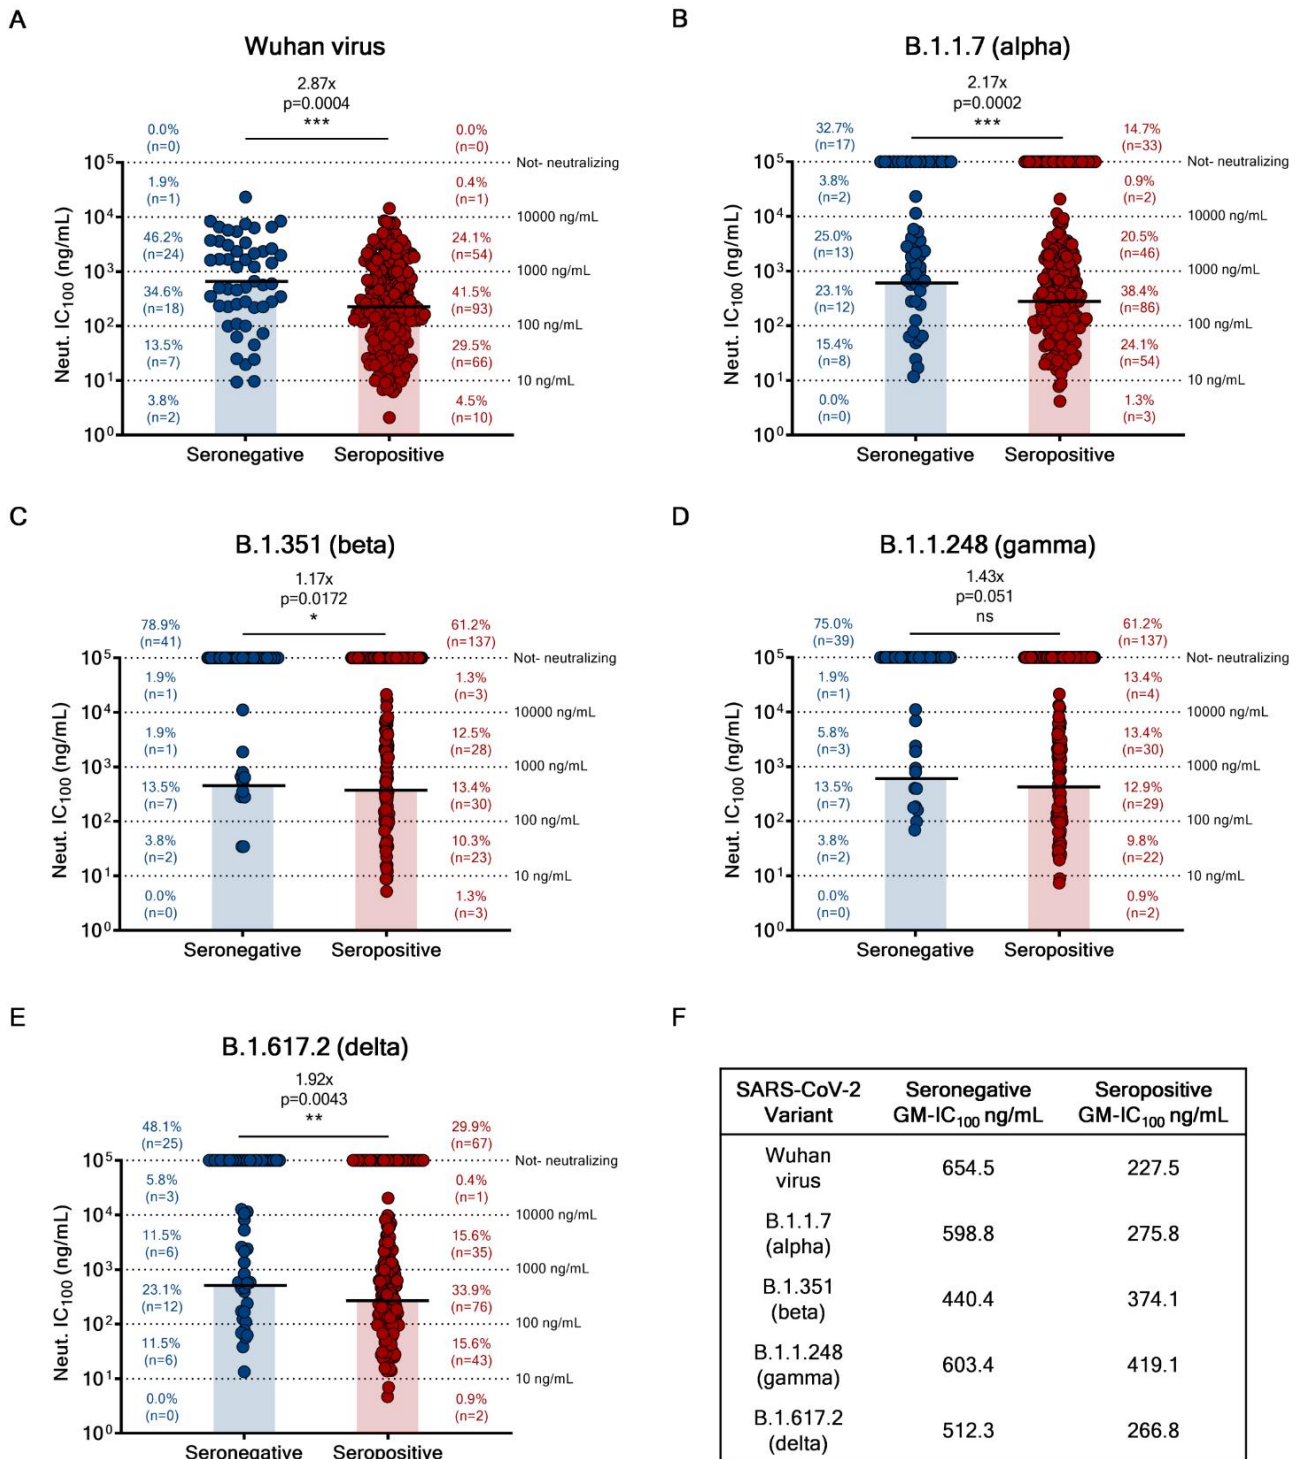

409

410 **Figure 2. Potency and breadth of neutralization of nAbs against SARS-CoV-2 and VoCs. (A - E)**  
 411 Scatter dot charts show the neutralization potency, reported as IC<sub>100</sub> (ng/mL), of nAbs tested against  
 412 the original Wuhan SARS-CoV-2 virus (A) and the B.1.1.7 (B), B.1.351 (C), B.1.1.248 (D) and  
 413 B.1.617.2 (E) VoCs. The number and percentage of nAbs from seronegatives vs seropositives, fold-  
 414 change and statistical significance are denoted on each graph. A nonparametric Mann-Whitney t test  
 415 was used to evaluate statistical significances between groups. Significances are shown as \*p < 0.05,

416 \*\*p < 0.01, \*\*\*p < 0.001, and \*\*\*\*p < 0.0001. (F) The table shows the IC<sub>100</sub> geometric mean (GM) of  
417 all nAbs pulled together from each group against all SARS-CoV-2 viruses tested.



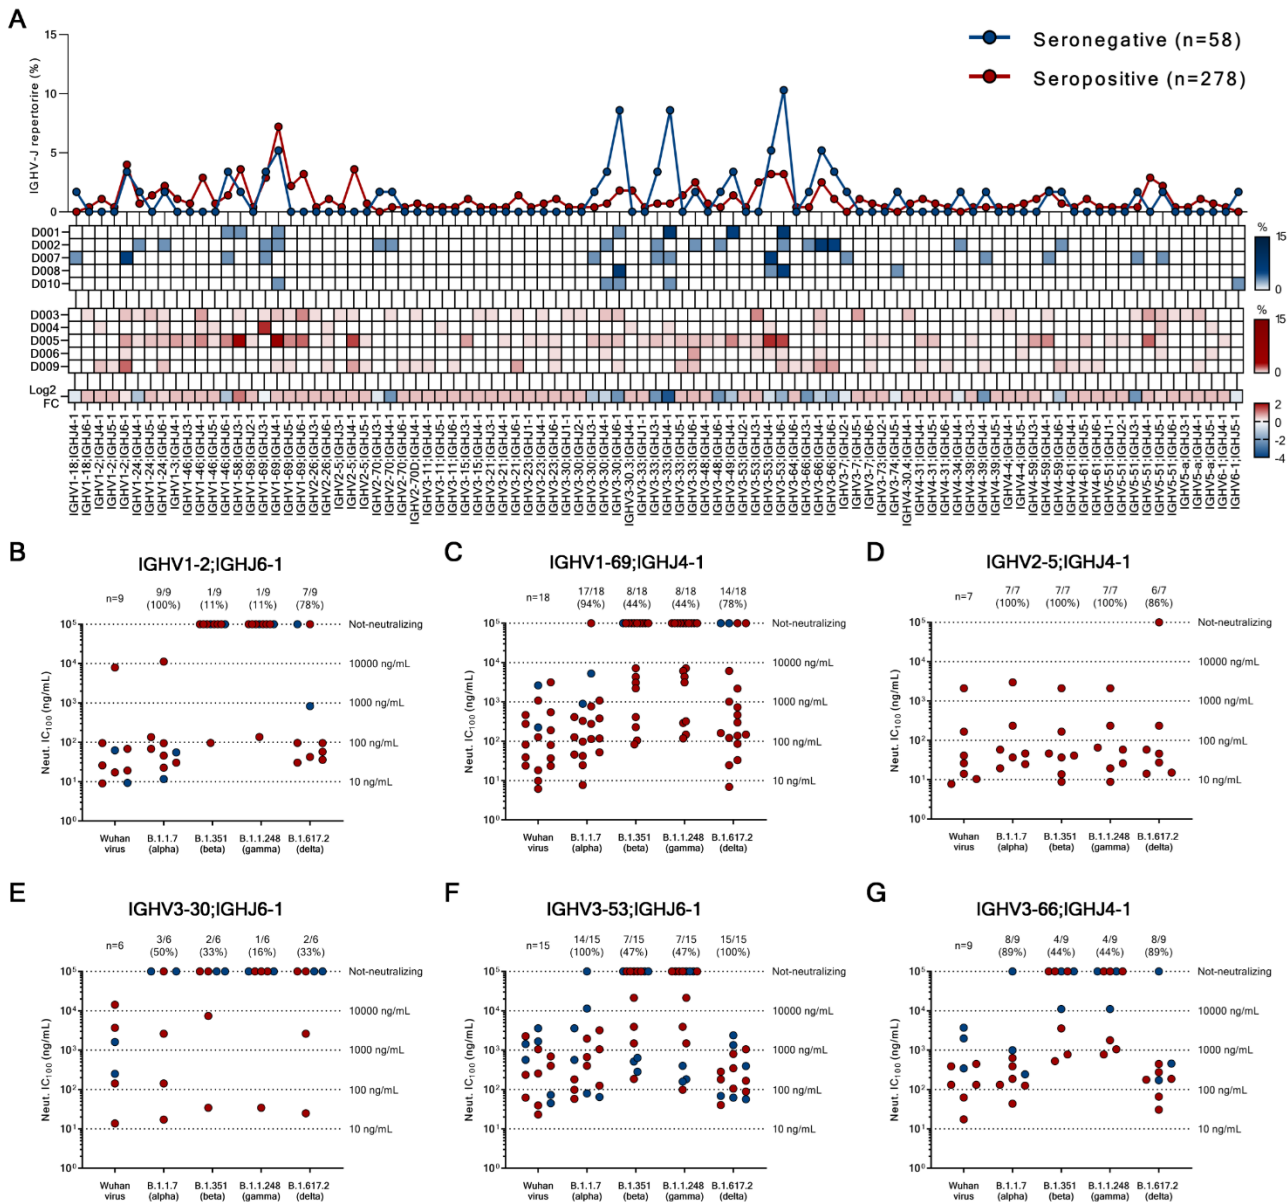

418

419

**Figure 3. Repertoire analyses and functional characterization of predominant gene derived nAbs.**

420

(A) The graph shows the IGHV-J rearrangement frequencies between seronegative and seropositive

421

vaccinees (top panel), the frequency within subjects (middle panels) and the Log2 fold change (FC)

422

between groups (bottom panel). (B - G) Graphs show the neutralization potency (IC<sub>100</sub>) of

423

predominant gene derived nAbs from the IGHV1-2;IGHJ6-1 (B), IGHV1-69;IGHJ4-1 (C), IGHV2-

424

5;IGHJ4-1 (D), IGHV3-30;IGHJ6-1 (E), IGHV3-53;IGHJ6-1 (F) and IGHV3-66;IGHJ4-1 (G) families,

425

against the original Wuhan SARS-CoV-2 virus and the B.1.1.7, B.1.351, B.1.1.248 and B.1.617.2

426

VoCs.

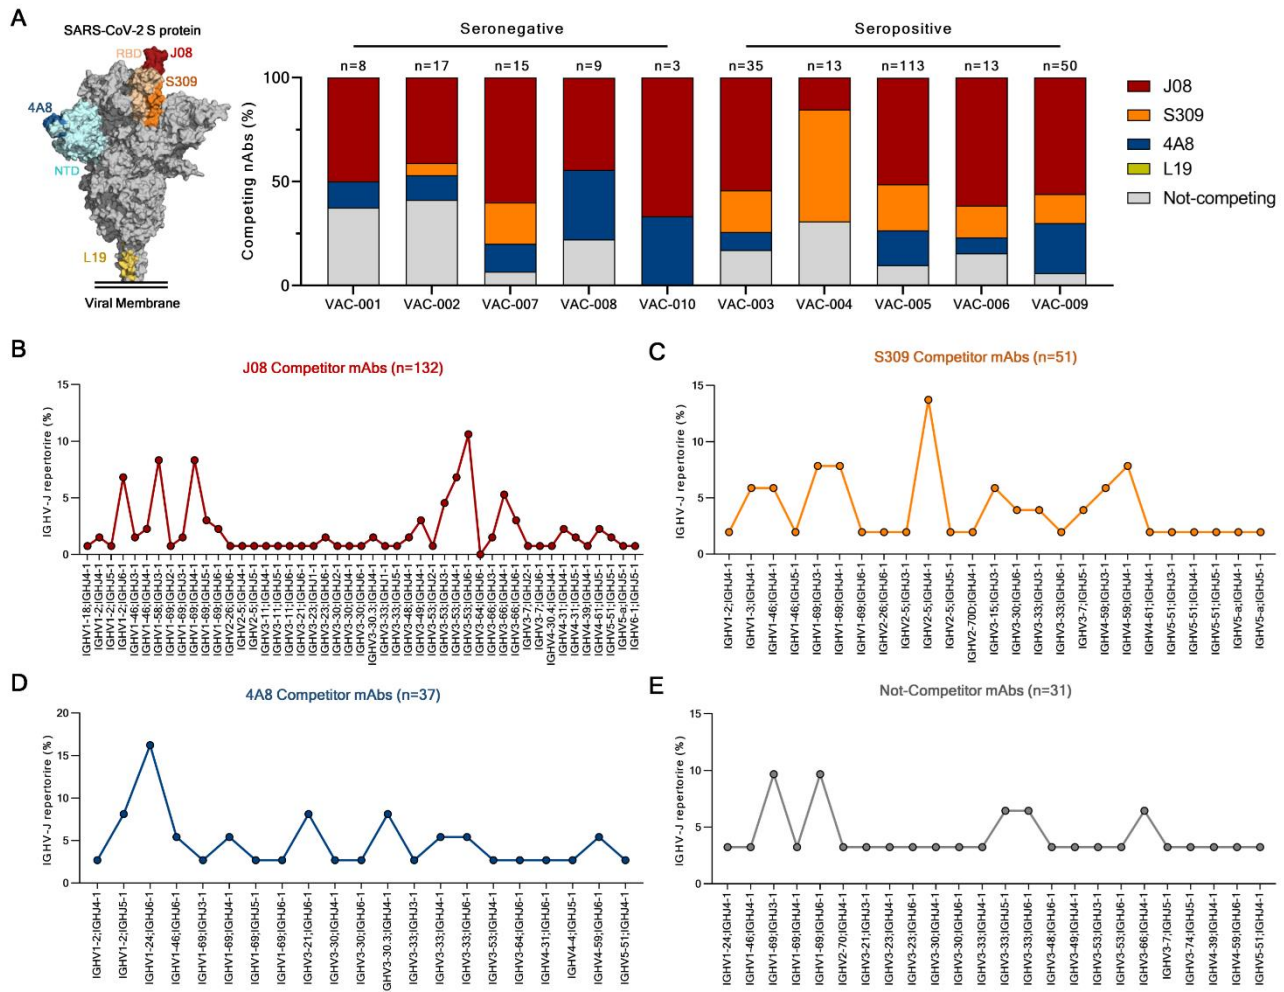

427

428

429

430

431

432

433

434

**Figure 4. Epitope binning and genetic characterization of competing nAbs.** (A) The bar graph shows the percentage (%) of nAbs competing with J08 (dark red), S309 (orange), 4A8 (dark blue) and L19 (gold), or antibodies that did not compete with any of the previous mAbs (gray). A schematic representation of J08, S309, 4A8 and L19 epitopes on the S protein surface is shown on the left side of the panel. (B - D) Graphs show the IGHV-J rearrangement percentage for nAbs that competed against J08 (B), S309 (C), 4A8 (D), or that did not compete with any of these mAbs (E). The total number (n) of competing nAbs per group is shown on top of each graph.

435 **SUPPLEMENTARY TABLES**

| Subject ID | Gender | Age | Previous COVID-19 negative test | COVID-19 positive test | Type of test | Severity of Infection | SARS-CoV-2 Serology | First Dose | Second Dose    | Blood Collection |
|------------|--------|-----|---------------------------------|------------------------|--------------|-----------------------|---------------------|------------|----------------|------------------|
| VAC-001    | M      | 38  | 16/12/2020                      | Not-applicable         | Swab         | Not-applicable        | Seronegative        | 27/12/2020 | 18/01/2021     | 02/03/2021       |
| VAC-002    | F      | 38  | 31/12/2020                      | Not-applicable         | Swab         | Not-applicable        | Seronegative        | 01/01/2021 | 22/01/2021     | 02/03/2021       |
| VAC-007    | M      | 38  | 29/12/2020                      | Not-applicable         | Swab         | Not-applicable        | Seronegative        | 04/01/2021 | 25/01/2021     | 31/03/2021       |
| VAC-008    | M      | 43  | 28/12/2020                      | Not-applicable         | Swab         | Not-applicable        | Seronegative        | 03/01/2021 | 24/01/2021     | 31/03/2021       |
| VAC-010    | F      | 51  | 15/02/2021                      | Not-applicable         | Swab         | Not-applicable        | Seronegative        | 18/02/2021 | 11/03/2021     | 07/04/2021       |
| VAC-003    | M      | 38  | 15/10/2020                      | 26/10/2020             | Swab         | Asymptomatic          | Seropositive        | 08/01/2021 | 15/02/2021     | 09/03/2021       |
| VAC-004    | F      | 25  | Not-applicable                  | 22/10/2020             | Swab         | Mild                  | Seropositive        | 08/02/2021 | 01/03/2021     | 09/03/2021       |
| VAC-005    | M      | 25  | 01/08/2020                      | 02/11/2020             | Serological  | Mild                  | Seropositive        | 11/01/2021 | 16/02/2021     | 16/03/2021       |
| VAC-006    | F      | 57  | 27/04/2020                      | 24/10/2020             | Swab         | Asymptomatic          | Seropositive        | 16/01/2021 | 11/02/2021     | 16/03/2021       |
| VAC-009    | M      | 46  | 29/09/2020                      | 06/11/2020             | Serological  | Moderate              | Seropositive        | 20/03/2021 | Not-applicable | 07/04/2021       |

436  
437 **Table S1. Clinical details of COVID-19 vaccinees.** This table summarizes all the clinically relevant  
438 information for the 5 seropositive and 5 seronegative vaccinated donors enrolled in this study.

| Subject                     | SARS-CoV-2 serology | S-protein+ MBCs Sorted | S-protein+ mAbs (n) | S-protein+ mAbs (%) | Wuhan - Neutralizing antibodies (n) | Wuhan - Neutralizing antibodies (%) | B.1.1.7 - Neutralizing antibodies (n) | B.1.1.7 - Neutralizing antibodies (%) | B.1.351 - Neutralizing antibodies (n) | B.1.351 - Neutralizing antibodies (%) | B.1.1.248 - Neutralizing antibodies (n) | B.1.1.248 - Neutralizing antibodies (%) |
|-----------------------------|---------------------|------------------------|---------------------|---------------------|-------------------------------------|-------------------------------------|---------------------------------------|---------------------------------------|---------------------------------------|---------------------------------------|-----------------------------------------|-----------------------------------------|
| VAC-001                     | Seronegative        | 484                    | 205                 | 42.3                | 13                                  | 6.3                                 | 8                                     | 61.5                                  | 2                                     | 15.4                                  | 6                                       | 46.2                                    |
| VAC-002                     | Seronegative        | 497                    | 316                 | 63.6                | 27                                  | 8.5                                 | 19                                    | 70.4                                  | 6                                     | 22.2                                  | 11                                      | 40.7                                    |
| VAC-007                     | Seronegative        | 161                    | 100                 | 62.1                | 16                                  | 16.0                                | 14                                    | 87.5                                  | 3                                     | 18.8                                  | 6                                       | 37.5                                    |
| VAC-008                     | Seronegative        | 682                    | 107                 | 15.7                | 10                                  | 9.3                                 | 6                                     | 60.0                                  | 5                                     | 50.0                                  | 6                                       | 60.0                                    |
| VAC-010                     | Seronegative        | 528                    | 216                 | 40.9                | 5                                   | 2.3                                 | 3                                     | 60.0                                  | 0                                     | 0.0                                   | 2                                       | 40.0                                    |
| <b>Total (Seronegative)</b> |                     | <b>2,352</b>           | <b>944</b>          | <b>40.1</b>         | <b>71</b>                           | <b>7.5</b>                          | <b>50</b>                             | <b>70.4</b>                           | <b>16</b>                             | <b>22.5</b>                           | <b>31</b>                               | <b>43.6</b>                             |
| VAC-003                     | Seropositive        | 616                    | 428                 | 69.5                | 78                                  | 18.2                                | 58                                    | 74.4                                  | 25                                    | 32.1                                  | 40                                      | 51.3                                    |
| VAC-004                     | Seropositive        | 506                    | 318                 | 62.8                | 31                                  | 9.7                                 | 24                                    | 77.4                                  | 11                                    | 35.5                                  | 18                                      | 58.1                                    |
| VAC-005                     | Seropositive        | 924                    | 601                 | 65.0                | 152                                 | 25.3                                | 132                                   | 86.8                                  | 78                                    | 51.3                                  | 114                                     | 75.0                                    |
| VAC-006                     | Seropositive        | 396                    | 216                 | 55.8                | 19                                  | 8.8                                 | 12                                    | 63.2                                  | 5                                     | 26.3                                  | 8                                       | 42.1                                    |
| VAC-009                     | Seropositive        | 1,090                  | 736                 | 67.5                | 60                                  | 8.1                                 | 48                                    | 80.0                                  | 15                                    | 25.0                                  | 31                                      | 51.7                                    |
| <b>Total (Seropositive)</b> |                     | <b>3,532</b>           | <b>2,299</b>        | <b>65.1</b>         | <b>340</b>                          | <b>14.8</b>                         | <b>274</b>                            | <b>80.6</b>                           | <b>134</b>                            | <b>39.4</b>                           | <b>211</b>                              | <b>62.0</b>                             |

439

440

441

442

443

444

445

**Table S2. Summary of COVID-19 vaccinees.** This table summarizes the number and percentages of single cell sorted S protein-specific MBCs, number and percentages of S protein binding mAbs, and neutralizing mAbs against the original Wuhan SARS-CoV-2 virus and VoCs. This table includes only data from the initial screening where nAbs were tested at a single point dilution against the original Wuhan virus and the B.1.1.7, B.1.351 and B.1.1.248 VoCs. At this stage the B.1.617.2 (delta) variant was not available.

| Subject                     | SARS-CoV-2 serology | Distribution Competition J08 (n) | Distribution Competition J08 (%) | Distribution Competition S309 (n) | Distribution Competition S309 (%) | Distribution Competition 4A8 (n) | Distribution Competition 4A8 (%) | Distribution Competition L19 (n) | Distribution Competition L19 (%) | Distribution Competition Not-competing (n) | Distribution Competition Not-competing (%) |
|-----------------------------|---------------------|----------------------------------|----------------------------------|-----------------------------------|-----------------------------------|----------------------------------|----------------------------------|----------------------------------|----------------------------------|--------------------------------------------|--------------------------------------------|
| VAC-001                     | Seronegative        | 4                                | 50.0                             | 0                                 | 0.0                               | 1                                | 12.5                             | 0                                | 0.0                              | 3                                          | 37.5                                       |
| VAC-002                     | Seronegative        | 7                                | 41.2                             | 1                                 | 5.9                               | 2                                | 11.8                             | 0                                | 0.0                              | 7                                          | 41.2                                       |
| VAC-007                     | Seronegative        | 9                                | 60.0                             | 3                                 | 20.0                              | 2                                | 13.3                             | 0                                | 0.0                              | 1                                          | 6.7                                        |
| VAC-008                     | Seronegative        | 4                                | 44.4                             | 0                                 | 0.0                               | 3                                | 33.3                             | 0                                | 0.0                              | 2                                          | 22.2                                       |
| VAC-010                     | Seronegative        | 2                                | 66.7                             | 0                                 | 0.0                               | 1                                | 33.3                             | 0                                | 0.0                              | 0                                          | 0.0                                        |
| <b>Total (Seronegative)</b> |                     | 26                               | 50.0                             | 4                                 | 7.7                               | 9                                | 17.3                             | 0                                | 0.0                              | 13                                         | 25.0                                       |
| VAC-003                     | Seropositive        | 19                               | 54.3                             | 7                                 | 20.0                              | 3                                | 8.6                              | 0                                | 0.0                              | 6                                          | 17.1                                       |
| VAC-004                     | Seropositive        | 2                                | 15.4                             | 7                                 | 53.8                              | 0                                | 0.0                              | 0                                | 0.0                              | 4                                          | 30.8                                       |
| VAC-005                     | Seropositive        | 58                               | 51.3                             | 25                                | 22.1                              | 19                               | 16.8                             | 0                                | 0.0                              | 11                                         | 9.7                                        |
| VAC-006                     | Seropositive        | 8                                | 61.5                             | 2                                 | 15.4                              | 1                                | 7.7                              | 0                                | 0.0                              | 2                                          | 15.4                                       |
| VAC-009                     | Seropositive        | 28                               | 56.0                             | 7                                 | 14.0                              | 12                               | 24.0                             | 0                                | 0.0                              | 3                                          | 6.0                                        |
| <b>Total (Seropositive)</b> |                     | 115                              | 51.3                             | 48                                | 21.4                              | 35                               | 15.6                             | 0                                | 0.0                              | 26                                         | 11.6                                       |

446

447

448

449

**Table S3. Competition assay.** This table summarizes the number and percentages of competing nAbs from seronegative and seropositive vaccinees against J08, S309, 4A8 and L19. Not-competing nAbs are also reported in this table.

450 **SUPPLEMENTARY FIGURES**

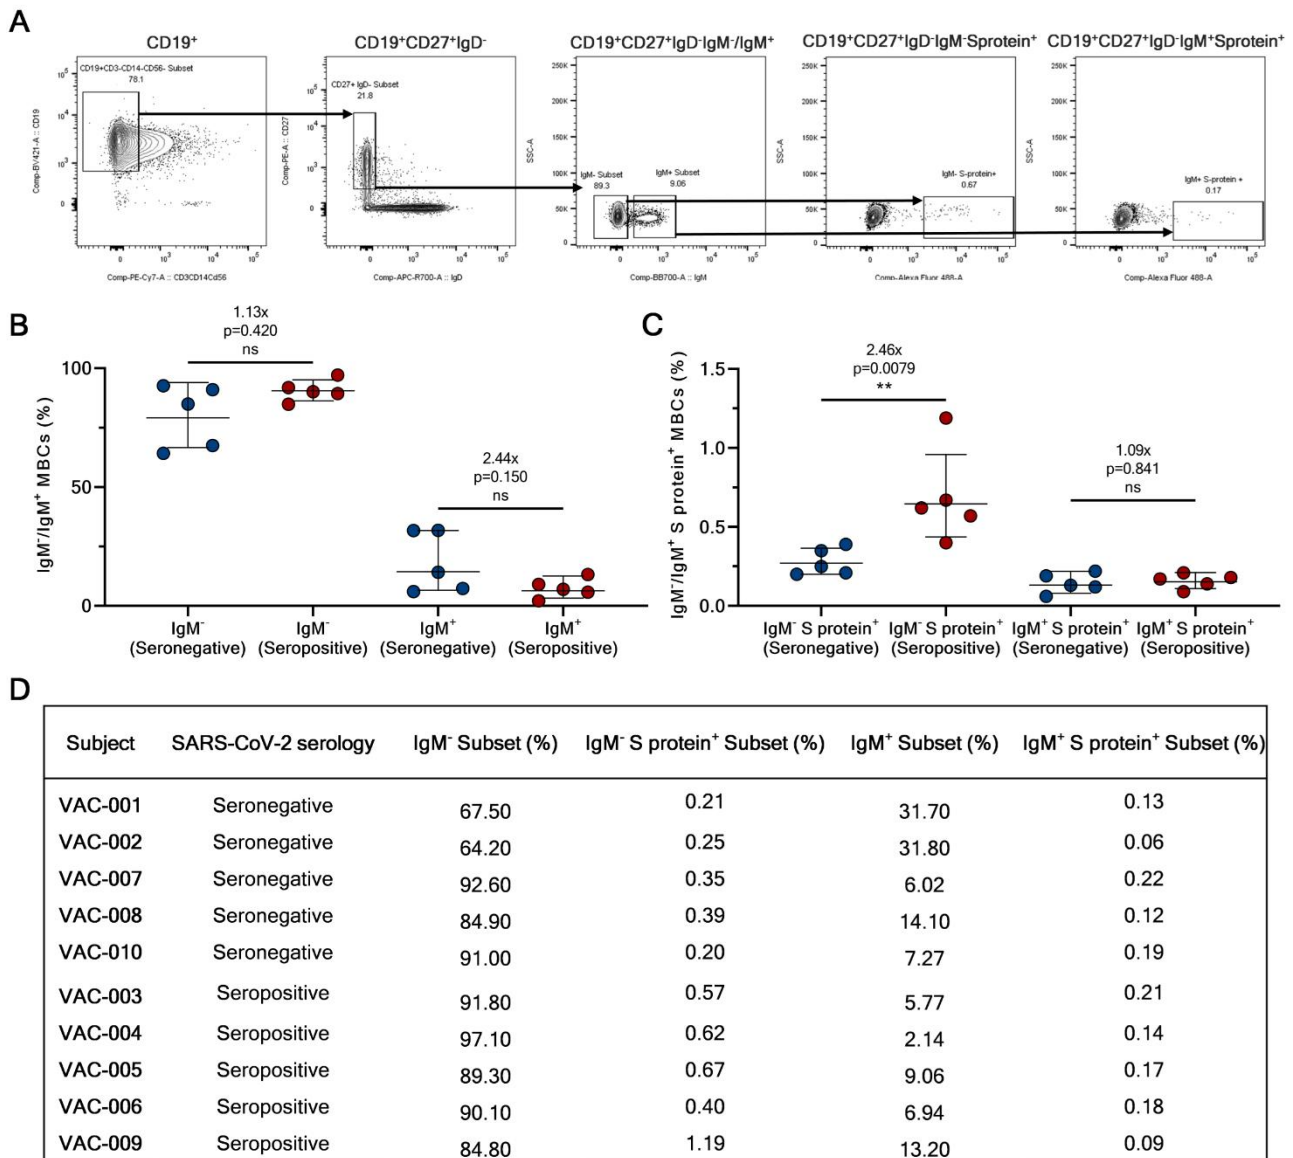

451

452 **Figure S1. Single cell sorting and memory B cell frequencies.** (A) The gating strategy shows from  
 453 left to right: CD19<sup>+</sup> B cells; CD19<sup>+</sup>CD27<sup>+</sup>IgD<sup>-</sup>; CD19<sup>+</sup>CD27<sup>+</sup>IgD-IgM<sup>-</sup>/IgM<sup>+</sup>; CD19<sup>+</sup>CD27<sup>+</sup>IgD-IgM<sup>-</sup>  
 454 Sprotein<sup>+</sup>; CD19<sup>+</sup>CD27<sup>+</sup>IgD-IgM<sup>+</sup>Sprotein<sup>+</sup>. (B) The graph shows the frequency of CD19<sup>+</sup>CD27<sup>+</sup>IgD-  
 455 IgM<sup>-</sup> and IgM<sup>+</sup>. (C) The graph shows the frequency of CD19<sup>+</sup>CD27<sup>+</sup>IgD-IgM<sup>-</sup> and IgM<sup>+</sup> able to bind  
 456 the SARS-CoV-2 S protein trimer (S protein<sup>+</sup>). (D) The table summarizes the frequencies of the cell  
 457 population above described for all subjects enrolled in our study.

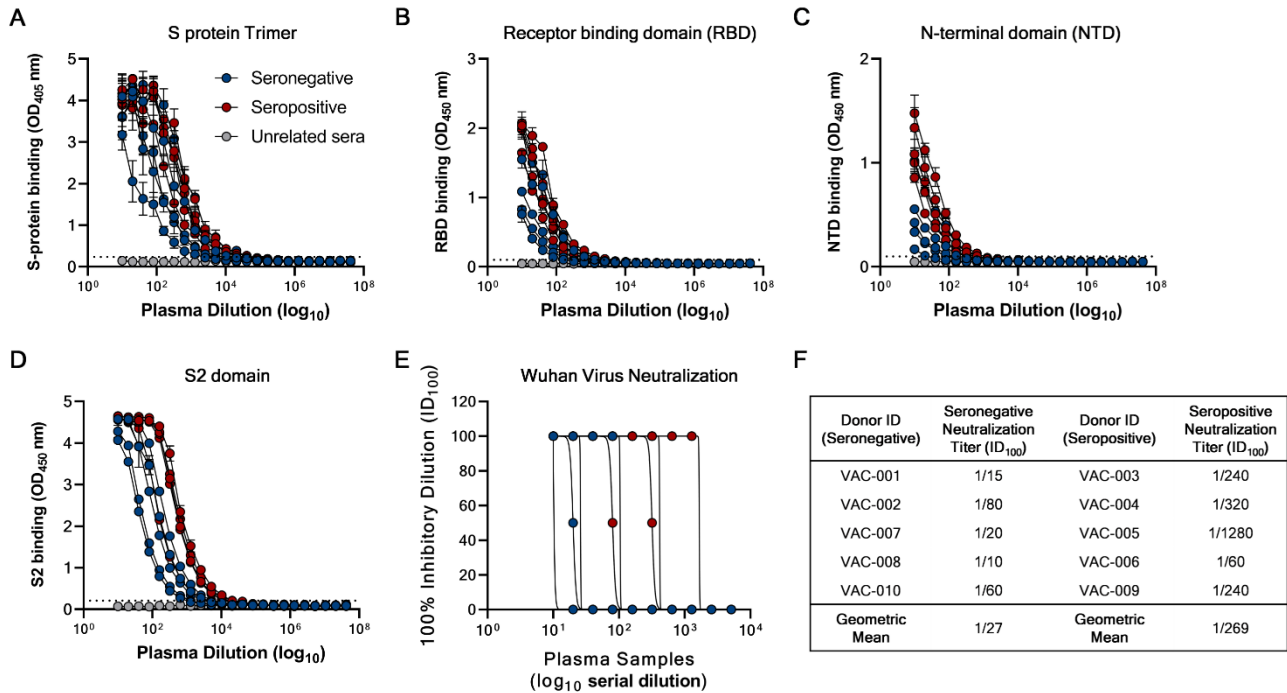

458

459 **Figure S2. Plasma response of COVID-19 vaccinees.** (A - D) Graphs show the ability of plasma  
 460 samples from seronegative and seropositive vaccinees to bind the S protein trimer (A), RBD (B),  
 461 NTD (C) and S2 domain (D). (E) The graph shows the neutralizing activity of plasma samples against  
 462 the original Wuhan SARS-CoV-2 virus. (F) The table summarizes the 100% inhibitory dilution (ID<sub>100</sub>)  
 463 of each COVID-19 vaccinee and the geometric mean for seronegative and seropositive donors.

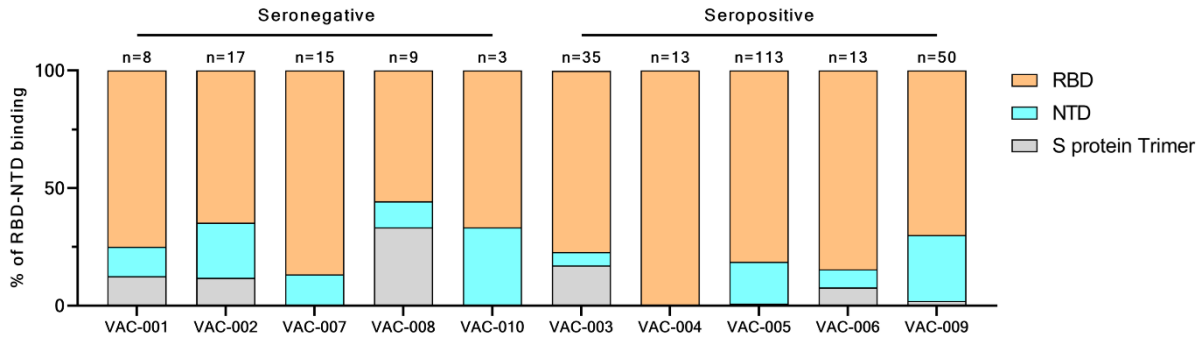

464

465

466

467

**Figure S3. RBD and NTD binding distribution of nAbs.** The graph shows the percentage of antibodies that bind specifically the RBD (light orange) or the NTD (cyan) or that did not bind single domains but recognized exclusively the S protein in its trimetric conformation (gray).



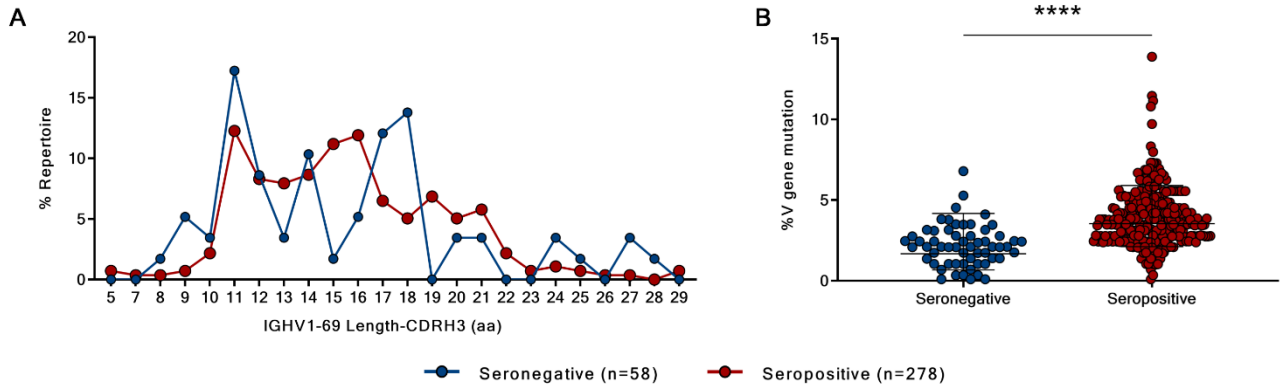

468

469 **Figure S4. Heavy chain CDR3 length and somatic hypermutation levels in seronegative and**  
470 **seropositive vaccinees.** (A) The graph shows the heavy chain CDR3 length represented in amino  
471 acids (aa). (B) The graph shows the overall somatic hypermutation level of nAbs isolated from  
472 seronegative and seropositive vaccinees.

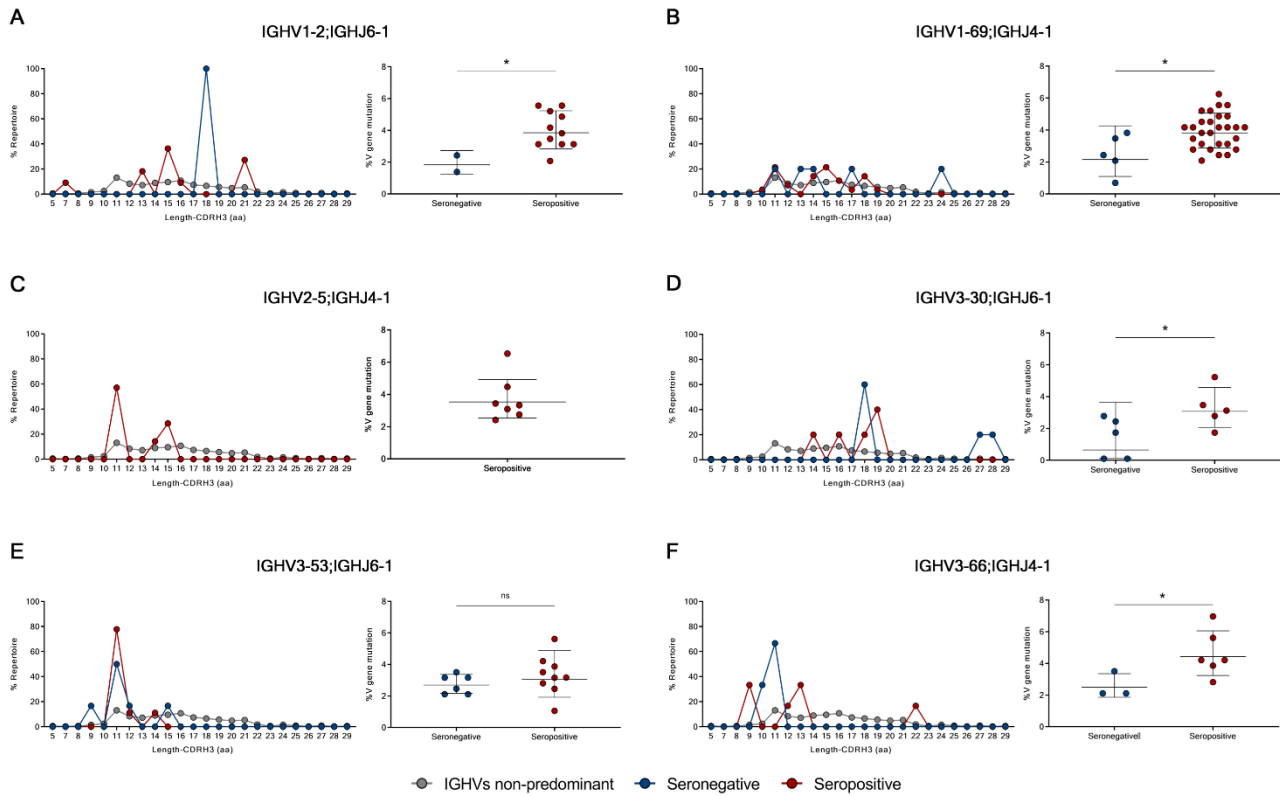

473

474

475

476

477

478

**Figure S5. Heavy chain CDR3 length and somatic hypermutation levels of predominant gene derived nAbs.** (A - F) Graphs show the amino acidic heavy chain CDR3 length (left panel) and the somatic hypermutation level (right panel) of nAbs derived from the IGHV1-2;IGHJ6-1 (A), IGHV1-69;IGHJ4-1 (B), IGHV2-5;IGHJ4-1 (C), IGHV3-30;IGHJ6-1 (D), IGHV3-53;IGHJ6-1 (E) and IGHV3-66;IGHJ4-1 (F) gene families.

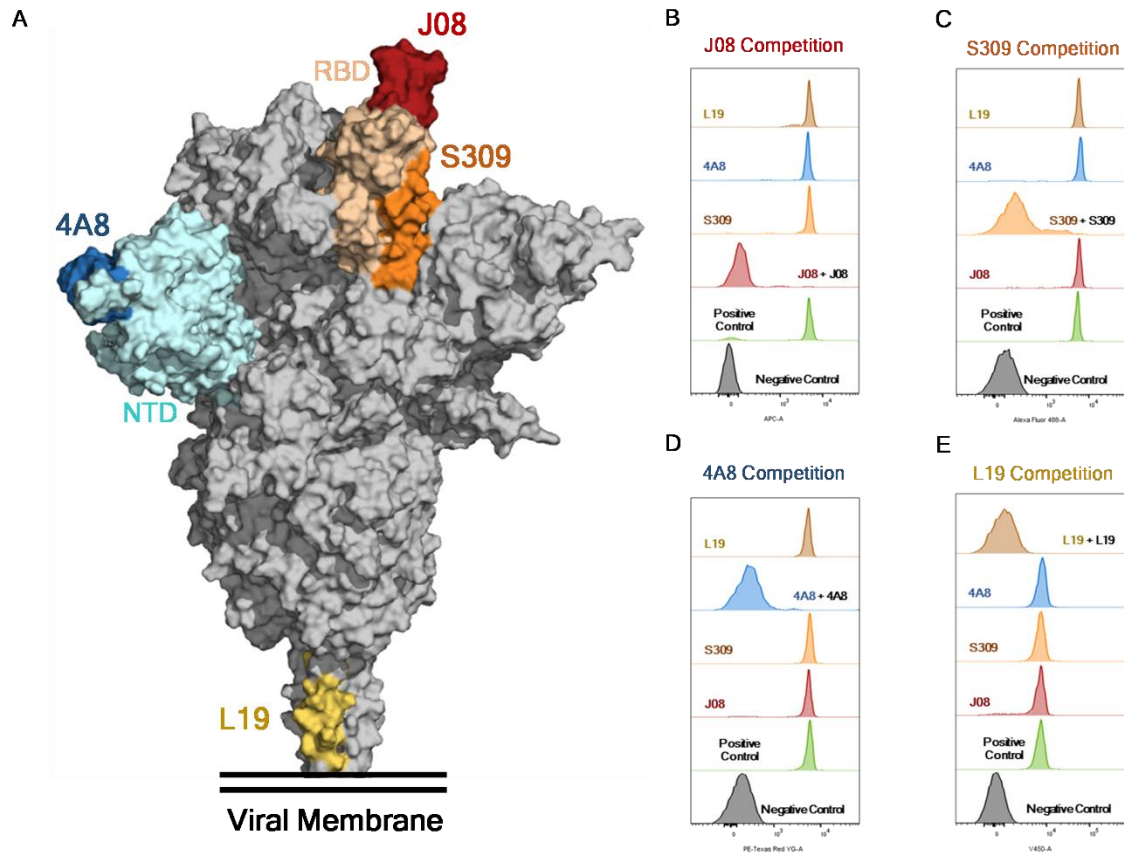

479

480 **Figure S6. Heavy chain CDR3 length and somatic hypermutation levels of predominant gene derived**  
481 **nAbs.** (A) Schematic representation of the epitopes recognized by J08 (dark red), S309 (orange),  
482 4A8 (dark blue) and L19 (gold), mAbs on the S protein surface. (B - E) Representative cytometer  
483 peaks per each of the four mAbs used for the competition assay. Positive (beads conjugated with  
484 only primary labeled antibody) and negative (un-conjugated beads) controls are shown as green and  
485 gray peaks, respectively.

486 **REFERENCES**

- 487 1 Wajnberg, A. *et al.* Robust neutralizing antibodies to SARS-CoV-2 infection persist for  
488 months. **370**, 1227-1230, doi:10.1126/science.abd7728 %J Science (2020).
- 489 2 Xiaojie, S., Yu, L., lei, Y., Guang, Y. & Min, Q. Neutralizing antibodies targeting SARS-CoV-  
490 2 spike protein. *Stem Cell Research* **50**, 102125,  
491 doi:<https://doi.org/10.1016/j.scr.2020.102125> (2021).
- 492 3 Andreano, E. *et al.* Extremely potent human monoclonal antibodies from COVID-19  
493 convalescent patients. *Cell* **184**, 1821-1835.e1816,  
494 doi:<https://doi.org/10.1016/j.cell.2021.02.035> (2021).
- 495 4 Yang, Y. & Du, L. SARS-CoV-2 spike protein: a key target for eliciting persistent neutralizing  
496 antibodies. *Signal Transduction and Targeted Therapy* **6**, 95, doi:10.1038/s41392-021-  
497 00523-5 (2021).
- 498 5 Clausen, T. M. *et al.* SARS-CoV-2 Infection Depends on Cellular Heparan Sulfate and ACE2.  
499 *Cell* **183**, 1043-1057.e1015, doi:<https://doi.org/10.1016/j.cell.2020.09.033> (2020).
- 500 6 Wrapp, D. *et al.* Cryo-EM structure of the 2019-nCoV spike in the prefusion conformation.  
501 **367**, 1260-1263, doi:10.1126/science.abb2507 %J Science (2020).
- 502 7 Piccoli, L. *et al.* Mapping Neutralizing and Immunodominant Sites on the SARS-CoV-2 Spike  
503 Receptor-Binding Domain by Structure-Guided High-Resolution Serology. *Cell* **183**, 1024-  
504 1042.e1021, doi:10.1016/j.cell.2020.09.037 (2020).
- 505 8 Tortorici, M. A. *et al.* Broad sarbecovirus neutralization by a human monoclonal antibody.  
506 *Nature*, doi:10.1038/s41586-021-03817-4 (2021).
- 507 9 Andreano, E. & Rappuoli, R. Immunodominant antibody germlines in COVID-  
508 19Immunodominant antibody germlines in COVID-19. *Journal of Experimental Medicine* **218**,  
509 doi:10.1084/jem.20210281 (2021).
- 510 10 Yuan, M. *et al.* Structural basis of a shared antibody response to SARS-CoV-2. **369**, 1119-  
511 1123, doi:10.1126/science.abd2321 %J Science (2020).
- 512 11 Callaway, E. Coronavirus variants get Greek names - but will scientists use them? *Nature*  
513 **594**, 162, doi:10.1038/d41586-021-01483-0 (2021).
- 514 12 Stamatatos, L. *et al.* mRNA vaccination boosts cross-variant neutralizing antibodies elicited  
515 by SARS-CoV-2 infection. **372**, 1413-1418, doi:10.1126/science.abg9175 %J Science  
516 (2021).
- 517 13 Goel, R. R. *et al.* Distinct antibody and memory B cell responses in SARS-CoV-2 naïve and  
518 recovered individuals after mRNA vaccination. **6**, eabi6950,  
519 doi:10.1126/sciimmunol.abi6950 %J Science Immunology (2021).
- 520 14 Urbanowicz, R. A. *et al.* Two doses of the SARS-CoV-2 BNT162b2 vaccine enhances  
521 antibody responses to variants in individuals with prior SARS-CoV-2 infection. eabj0847,  
522 doi:10.1126/scitranslmed.abj0847 %J Science Translational Medicine (2021).

- 523 15 Crotty, S. Hybrid immunity. **372**, 1392-1393, doi:10.1126/science.abj2258 %J Science  
524 (2021).
- 525 16 Wang, Z. *et al.* Naturally enhanced neutralizing breadth against SARS-CoV-2 one year after  
526 infection. *Nature* **595**, 426-431, doi:10.1038/s41586-021-03696-9 (2021).
- 527 17 Zhang, Q. *et al.* Potent and protective IGHV3-53/3-66 public antibodies and their shared  
528 escape mutant on the spike of SARS-CoV-2. *Nature Communications* **12**, 4210,  
529 doi:10.1038/s41467-021-24514-w (2021).
- 530 18 Pinto, D. *et al.* Cross-neutralization of SARS-CoV-2 by a human monoclonal SARS-CoV  
531 antibody. *Nature* **583**, 290-295, doi:10.1038/s41586-020-2349-y (2020).
- 532 19 Chi, X. *et al.* A neutralizing human antibody binds to the N-terminal domain of the Spike  
533 protein of SARS-CoV-2. **369**, 650-655, doi:10.1126/science.abc6952 %J Science (2020).
- 534 20 Voss, W. N. *et al.* Prevalent, protective, and convergent IgG recognition of SARS-CoV-2 non-  
535 RBD spike epitopes. **372**, 1108-1112, doi:10.1126/science.abg5268 %J Science (2021).
- 536 21 Li, B. *et al.* Viral infection and transmission in a large, well-traced outbreak caused by the  
537 SARS-CoV-2 Delta variant. 2021.2007.2007.21260122, doi:10.1101/2021.07.07.21260122  
538 %J medRxiv (2021).
- 539 22 Meng, B. *et al.* Recurrent emergence of SARS-CoV-2 spike deletion H69/V70 and its role in  
540 the Alpha variant B.1.1.7. *Cell Reports* **35**, doi:10.1016/j.celrep.2021.109292 (2021).
- 541 23 Steichen, J. M. *et al.* A generalized HIV vaccine design strategy for priming of broadly  
542 neutralizing antibody responses. **366**, eaax4380, doi:10.1126/science.aax4380 %J Science  
543 (2019).
- 544 24 Havenar-Daughton, C., Abbott, R. K., Schief, W. R. & Crotty, S. When designing vaccines,  
545 consider the starting material: the human B cell repertoire. *Current opinion in immunology*  
546 **53**, 209-216, doi:10.1016/j.coi.2018.08.002 (2018).
- 547 25 Huang, J. *et al.* Isolation of human monoclonal antibodies from peripheral blood B cells.  
548 *Nature Protocols* **8**, 1907-1915, doi:10.1038/nprot.2013.117 (2013).
- 549 26 Planas, D. *et al.* Sensitivity of infectious SARS-CoV-2 B.1.1.7 and B.1.351 variants to  
550 neutralizing antibodies. *Nature Medicine* **27**, 917-924, doi:10.1038/s41591-021-01318-5  
551 (2021).
- 552 27 Tiller, T. *et al.* Efficient generation of monoclonal antibodies from single human B cells by  
553 single cell RT-PCR and expression vector cloning. *J Immunol Methods* **329**, 112-124,  
554 doi:10.1016/j.jim.2007.09.017 (2008).
- 555 28 Wardemann, H. & Busse, C. E. Expression Cloning of Antibodies from Single Human B Cells.  
556 *Methods in molecular biology (Clifton, N.J.)* **1956**, 105-125, doi:10.1007/978-1-4939-9151-  
557 8\_5 (2019).
- 558 29 Kepler, T. B. Reconstructing a B-cell clonal lineage. I. Statistical inference of unobserved  
559 ancestors. *F1000Res* **2**, 103-103, doi:10.12688/f1000research.2-103.v1 (2013).

560 30 Kepler, T. B. *et al.* Reconstructing a B-Cell Clonal Lineage. II. Mutation, Selection, and Affinity  
561 Maturation. **5**, doi:10.3389/fimmu.2014.00170 (2014).
